# Supplementary material for: Optic Nerve Head Hemoglobin Levels in Glaucoma: A Structural and Functional Correlation Study
Source: J Ophthalmol. 2021 Oct 7;2021:9916102. doi: 10.1155/2021/9916102 (PMC8516580; doi:10.1155/2021/9916102)
Supplement: Supplementary Materials — ONH Hb and VFMD DATA_JO experimental data of the manuscript are included in the supplementary file. [file 9916102.f1.txt]

GDF	VFMD
-33,71	-5,8
-39,42	-1,41
-40,71	-11,23
-37,77	-13,94
-37,07	-0,33
-52,14	-12,07
-33,71	-3,37
-33,36	-13,01
-49,29	-7,83
-43,8	-4,55
-10,79	-1,64
5,97	-0,77
-22,83	-8,54
-47,19	-14,1
-31,87	-1,61
-27,48	0,7
-30,56	-3,22
-34,16	-3,26
-22,64	-0,5
-33,05	-2,14
-18,86	-0,07
-15,86	-4,83
-31,78	-12,95
8,64	-14,24
-3,86	-3,78
-0,93	-2,81
-55,96	-25,86
-34,98	-0,42
-19,31	-11,18
10,45	-2,81
-25,7	-4,11
-12,11	-3,47
-8,82	-1,85
-30,65	-1,91
1,78	-3,42
-42,89	-10,58
-17,92	-4,56
-38,66	-1,88
-37,94	-5
-15,46	-6,47
-9,28	-4,39
-9,45	-1,24
-37,43	0,5
-43,11	-2,37
-44,17	-8,1
-38,57	-13,95
-35,08	-2,57
-37,72	-24,89
-42,87	-2,45
0,28	-8,78
-9,25	-0,88
-35,74	-1,12
-24,4	-3,99
-32,4	-2,38
-35,52	-3,76
-31,55	0,41
-23,16	-5,02
-12,71	-1,02
-6,42	0,4
-22,36	-0,14
-31,99	-0,08
-21,17	-0,13
9,44	-1,35
-6,66	-3,43
-33,06	-1,4
-18,58	-1,21
-45,8	-2,73
-34,65	-0,74
0,64	-0,43
-43,64	-1,97
-41,84	-1,47
-11,5	-1,57
-32,97	-8,42
-37,77	0,4
-36,53	-17,1
-6,6	-12,03
-46,6	-25,89
-43,6	-25,2
-61,69	-4,11
-54,45	-7,26
-16,29	-0,64
-15,9	-4,48
-60,51	-22,43
-13,86	-20,56
-45,18	-17,44
-51,42
25,01	-20
28,74	-19,33
-40,43	-20,65
-48,68	-29,64
	-13,33
18,82	-4,98
-44,84	-2,86
-57,98	-4,41
-74,55	-31,1
-54,62	-27,46
-22,1	-6,09
-36,87	-28,06
-37,75	-16,05
-38,58	-12,52
-9,25	-0,88
-35,74	-1,12
-24,4	-3,99
-32,4	-2,38
-35,52	-3,76
-31,55	0,41
-23,16	-5,02
-12,71	-1,02
-6,42	0,4
-21,95	-4,11
-25,67	-2,18
-30,21	-1,28
-33,72	-1,61
-40,71	-11,23
-37,77	-13,94
-37,07	-0,33
-52,14	-12,07
-33,71	-3,37
-33,36	-13,01
-49,29	-7,83
-43,8	-4,55
-10,79	-1,64
5,97	-0,77
-22,83	-8,54
-47,19	-14,1
-37,43	0,5
-43,11	-2,37
-44,17	-8,1
-38,57	-13,95
-35,08	-2,57
-37,72	-24,89
-42,87	-2,45
0,28	-8,78
-37,97	-8,05
-29,62	-7,01
-9,25	-0,88
-35,74	-1,12
-37,43	0,5
-43,11	-2,37
-44,17	-8,1
-38,57	-13,95
-35,08	-2,57
-37,72	-24,89
-42,87	-2,45
0,28	-8,78
-37,97	-8,05
-29,62	-7,01
-9,25	-0,88
-35,74	-1,12
-31,55	0,41
-23,16	-5,02
-12,71	-1,02
-6,42	0,4
-21,95	-4,11
-25,67	-2,18
-30,21	-1,28
-39,42	-1,41
-40,71	-11,23
-37,77	-13,94
-37,07	-0,33
-52,14	-12,07
-33,71	-3,37
-33,36	-13,01
-49,29	-7,83
-43,8	-4,55
-10,79	-1,64
5,97	-0,77
-22,83	-8,54
-47,19	-14,1
-31,87	-1,61
-27,48	0,7
-30,56	-3,22
-34,16	-3,26
-22,64	-0,5
-33,05	-2,14
-18,86	-0,07
-15,86	-4,83
-31,78	-12,95
8,64	-14,24
-3,86	-3,78
-0,93	-2,81
-55,96	-25,86
-34,98	-0,42
-19,31	-11,18
10,45	-2,81
-25,7	-4,11
-12,11	-3,47
-8,82	-1,85
-30,65	-1,91
1,78	-3,42
-42,89	-10,58
-17,92	-4,56
-38,66	-1,88
-37,94	-5
-15,46	-6,47
-9,28	-4,39
-9,45	-1,24
